# Supplementary material for: Risk Factors with the Greatest Impact on Caregiver Burden in Informal Homecare Settings in Austria: A Quantitative Secondary Data Analysis
Source: Hindawi journal article supplement (doi:10.1155/2023/3270083), 2023-03-31
Supplement: f1 [file 3270083.f1.zip]

Archive with 3 entries (3 files):
- ID3270083_online supplement 1.pdf
- ID3270083_online supplement 2.pdf
- ID3270083_online supplement 3.pdf
