# Supplementary material for: Risk Factors with the Greatest Impact on Caregiver Burden in Informal Homecare Settings in Austria: A Quantitative Secondary Data Analysis
Source: Hindawi journal article supplement (doi:10.1155/2023/3270083), 2023-03-31
Supplement: f1 [file 3270083.f1.zip]

### ***Supplementary Information File 1: Factor Analysis regarding frequency of care activities***

In the original dataset there were eighteen variables describing different caregiving activities. Caregivers were asked about the frequency, in which they had to perform these activities: 1-daily, 2-multiple times per week, 3-multiple times per month; 4-rarely or 5-never. Aiming to facilitate a parsimonious data analysis we reduced these variables to a small set of uncorrelated principal components containing most the information of the original data, using principal component analysis (PCA) (Cozzolino et al., 2019). 1445 cases were analyzed (considering listwise missing values elimination). In a first step, the requisites for conducting a PCA were evaluated: sample adequacy using Kaiser-Meyer-Olkin Criterium (KMO=0.922) and Bartlett's sphericity test ( $X^2$  (df=153) =18133.171,  $p<0.001$ ) was verified. Secondly, for an observed cumulated explained variance of 68.8%, four factors with eigenvalues >1 were retained. Using a varimax rotation, we observed loadings between 0.405-0.818 for component 1, 0.654-0.823 for component 2, 0.646-0.854 for component 3 and 0.512-0.868 for component 4. Internal consistency analysis showed a high Cronbach's alpha for the developed components (component 1 (8 items)=0.921; component 2 (4 items)=0.829; component 3 (3 items)=0.807; component 4 (3 items)=0.717). After discussing the PCA results in the project team, component one was label as "Activities regarding direct care," component 2 as "Activities regarding support in daily life," component 3 as "Activities regarding mobility and joint dislocations" and component 4 as "Organizational activities."

#### **Descriptive Statistics**

|                                                       | M   | SD  | N    |
|-------------------------------------------------------|-----|-----|------|
| Preparing meals                                       | 2.0 | 1.4 | 1445 |
| Shopping                                              | 2.0 | 0.9 | 1445 |
| Doing household chores                                | 1.9 | 1.3 | 1445 |
| Organizing heating material                           | 3.0 | 1.8 | 1445 |
| Dealing with finances                                 | 2.6 | 1.2 | 1445 |
| Dealing with authorities and mail                     | 2.7 | 1.1 | 1445 |
| Preparing medication                                  | 2.4 | 1.6 | 1445 |
| Assisting with eating and drinking                    | 3.1 | 1.8 | 1445 |
| Assisting with taking medication                      | 2.8 | 1.8 | 1445 |
| Helping with getting up or walking                    | 2.8 | 1.6 | 1445 |
| Helping with climbing stairs                          | 3.1 | 1.7 | 1445 |
| Accompanying to doctor's appointments and other trips | 2.8 | 1.3 | 1445 |
| Helping with bathing/showering                        | 2.7 | 1.6 | 1445 |
| Supervising                                           | 2.7 | 1.7 | 1445 |
| Helping with dressing and undressing                  | 2.6 | 1.7 | 1445 |
| Helping with toilet visits or incontinence care       | 3.2 | 1.8 | 1445 |
| Keeping company                                       | 1.5 | 0.8 | 1445 |
| Cheering up                                           | 1.8 | 1.1 | 1445 |

### KMO and Bartlett's Test

|                                                  |                    |           |
|--------------------------------------------------|--------------------|-----------|
| Kaiser-Meyer-Olkin Measure of Sampling Adequacy. |                    | 0.922     |
| Bartlett's Test of Sphericity                    | Approx. Chi-Square | 18133.171 |
|                                                  | df                 | 153       |
|                                                  | Sig.               | <0.001    |

### Communalities

|                                                       | Initial | Extraction |
|-------------------------------------------------------|---------|------------|
| Preparing meals                                       | 1.000   | 0.768      |
| Shopping                                              | 1.000   | 0.652      |
| Doing household chores                                | 1.000   | 0.797      |
| Organizing heating material                           | 1.000   | 0.409      |
| Dealing with finances                                 | 1.000   | 0.787      |
| Dealing with authorities and mail                     | 1.000   | 0.804      |
| Preparing medication                                  | 1.000   | 0.626      |
| Assisting with eating and drinking                    | 1.000   | 0.694      |
| Assisting with taking medication                      | 1.000   | 0.740      |
| Helping with getting up or walking                    | 1.000   | 0.745      |
| Helping with climbing stairs                          | 1.000   | 0.814      |
| Accompanying to doctor's appointments and other trips | 1.000   | 0.722      |
| Helping with bathing/showering                        | 1.000   | 0.701      |
| Supervising                                           | 1.000   | 0.687      |
| Helping with dressing and undressing                  | 1.000   | 0.758      |
| Helping with toilet visits or incontinence care       | 1.000   | 0.754      |
| Keeping company                                       | 1.000   | 0.555      |
| Cheering up                                           | 1.000   | 0.354      |

Extraction Method: Principal Component Analysis.

### Total Variance Explained

| Component | Initial Eigenvalues |               |              | Rotation Sums of Squared Loadings |               |              |
|-----------|---------------------|---------------|--------------|-----------------------------------|---------------|--------------|
|           | Total               | % of Variance | Cumulative % | Total                             | % of Variance | Cumulative % |
| 1         | 8.372               | 46.512        | 46.512       | 4.674                             | 25.964        | 25.964       |
| 2         | 1.547               | 8.597         | 55.109       | 3.089                             | 17.159        | 43.123       |
| 3         | 1.239               | 6.883         | 61.992       | 2.328                             | 12.931        | 56.054       |
| 4         | 1.217               | 6.759         | 68.751       | 2.286                             | 12.697        | 68.751       |

### Rotated Component Matrix <sup>a</sup>

|                                                       | Component |       |       |       | Labels                        |
|-------------------------------------------------------|-----------|-------|-------|-------|-------------------------------|
|                                                       | 1         | 2     | 3     | 4     |                               |
| Helping with toilet visits or incontinence care       | 0.818     |       |       |       | Direct care                   |
| Assisting with taking medication                      | 0.791     |       |       |       |                               |
| Assisting with eating and drinking                    | 0.786     |       |       |       |                               |
| Supervising                                           | 0.730     |       |       |       |                               |
| Helping with dressing and undressing                  | 0.720     | 0.348 | 0.340 |       |                               |
| Preparing medication                                  | 0.659     | 0.368 |       |       |                               |
| Helping with bathing/showering                        | 0.566     | 0.423 | 0.434 |       |                               |
| Cheering up                                           | 0.405     | 0.392 |       |       |                               |
| Doing household chores                                |           | 0.823 |       |       | Support in daily life         |
| Preparing meals                                       | 0.310     | 0.794 |       |       |                               |
| Keeping company                                       | 0.334     | 0.659 |       |       |                               |
| Shopping                                              |           | 0.654 |       | 0.380 |                               |
| Helping with climbing stairs                          |           |       | 0.854 |       | Mobility & joint dislocations |
| Accompanying to doctor's appointments and other trips |           |       | 0.754 | 0.306 |                               |
| Helping with getting up or walking                    | 0.552     |       | 0.646 |       |                               |
| Dealing with authorities and mail                     |           |       |       | 0.868 | Organizational                |
| Dealing with finances                                 |           |       |       | 0.834 |                               |
| Organizing heating material                           |           | 0.317 |       | 0.512 |                               |

Extraction Method: Principal Component Analysis.

Rotation Method: Varimax with Kaiser Normalization.

a. Rotation converged in six iterations.
