# Supplementary material for: Risk Factors with the Greatest Impact on Caregiver Burden in Informal Homecare Settings in Austria: A Quantitative Secondary Data Analysis
Source: Hindawi journal article supplement (doi:10.1155/2023/3270083), 2023-03-31
Supplement: f1 [file 3270083.f1.zip]

### Supplementary Information File 3 – Quality of Model Adjustment (Goodness of Fit)

Goodness of Fit<sup>a</sup>

|                                      | Wert     | df   | Wert/df |
|--------------------------------------|----------|------|---------|
| Deviance                             | 1280.786 | 1117 | 1.147   |
| Scaled Deviance                      | 1280.786 | 1117 |         |
| Pearson Chi-Square                   | 1121.238 | 1117 | 1.004   |
| Scaled Pearson Chi-Square            | 1121.238 | 1117 |         |
| Log Likelihood <sup>b</sup>          | -775.674 |      |         |
| Akaike's Information Criterion (AIC) | 1563.348 |      |         |
| Finite Sample Corrected AIC (AICC)   | 1563.391 |      |         |
| Bayesian Information Criterion (BIC) | 1596.841 |      |         |
| Consistent AIC (CAIC)                | 1602.841 |      |         |

a. Information criteria are in smaller-is-better form.

b. The full log likelihood function is displayed and used in computing information criteria.

Tests of Model Effects

| Quelle                         | Wald-Chi-Quadrat | Type III<br>df | Sig.   |
|--------------------------------|------------------|----------------|--------|
| (Intercept)                    | 4.513            | 1              | 0.034  |
| Time spent on care             | 4.990            | 1              | 0.025  |
| Behavioural problems           | 40.263           | 1              | <0.001 |
| Care dependency level          | 15.954           | 1              | <0.001 |
| Intensity of Care: Direct Care | 100.715          | 1              | <0.001 |
| Health status                  | 146.662          | 1              | <0.001 |

### Analysis of standardized residuals

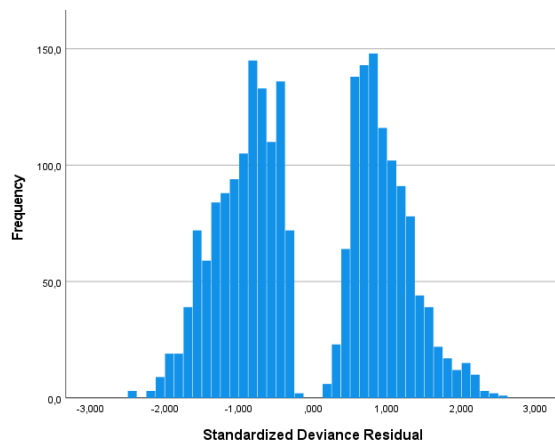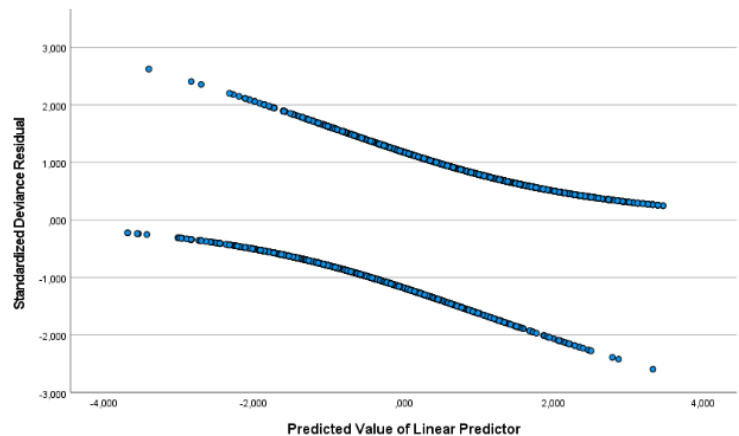

(Mean=0.0, SD= 1.1)
