# Supplementary material for: Risk Factors with the Greatest Impact on Caregiver Burden in Informal Homecare Settings in Austria: A Quantitative Secondary Data Analysis
Source: Hindawi journal article supplement (doi:10.1155/2023/3270083), 2023-03-31
Supplement: f1 [file 3270083.f1.zip]

## Supplementary Information File 2 – Descriptive Statistics

### Caregiver Burden (visual analysis of normality)

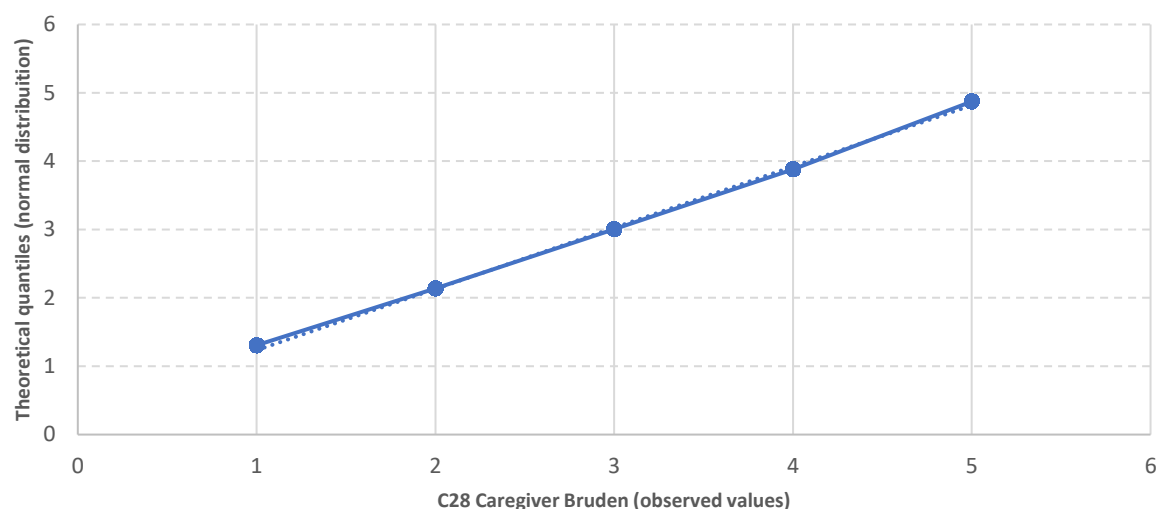

### Categorical independent variables

|                                                                                  |                                 |      |        | 0 no |        | Burden<br>1 yes |        | Total |        |
|----------------------------------------------------------------------------------|---------------------------------|------|--------|------|--------|-----------------|--------|-------|--------|
|                                                                                  |                                 | n    | %      | n    | %      | n               | %      | n     | %      |
| <b>Relation to caregiver:</b><br><i>Mother/Father;<br/>Stepmother/Stepfather</i> | 0 no                            | 1402 | 57.0%  | 677  | 54.0%  | 663             | 59.2%  | 1340  | 56.5%  |
|                                                                                  | 1 yes                           | 1057 | 43.0%  | 577  | 46.0%  | 456             | 40.8%  | 1033  | 43.5%  |
|                                                                                  | Total                           | 2459 | 100.0% | 1254 | 100.0% | 1119            | 100.0% | 2373  | 100.0% |
| <b>Gender of caregiver</b>                                                       | 1 Man                           | 692  | 28.0%  | 392  | 31.1%  | 271             | 24.1%  | 663   | 27.8%  |
|                                                                                  | 2 Woman                         | 1779 | 72.0%  | 868  | 68.9%  | 855             | 75.9%  | 1723  | 72.2%  |
|                                                                                  | Total                           | 2471 | 100.0% | 1260 | 100.0% | 1126            | 100.0% | 2386  | 100.0% |
| <b>Health status</b>                                                             | 1 very good                     | 279  | 11.4%  | 212  | 16.9%  | 57              | 5.1%   | 269   | 11.3%  |
|                                                                                  | 2 good                          | 893  | 36.4%  | 552  | 44.0%  | 307             | 27.5%  | 859   | 36.2%  |
|                                                                                  | 3 fair                          | 1081 | 44.0%  | 451  | 35.9%  | 598             | 53.5%  | 1049  | 44.2%  |
|                                                                                  | 4 poor                          | 172  | 7.0%   | 38   | 3.0%   | 127             | 11.4%  | 165   | 7.0%   |
|                                                                                  | 5 very poor                     | 30   | 1.2%   | 2    | 0.2%   | 28              | 2.5%   | 30    | 1.3%   |
|                                                                                  | Total                           | 2455 | 100.0% | 1255 | 100.0% | 1117            | 100.0% | 2372  | 100.0% |
| <b>Household size</b>                                                            | 1 One-person household          | 245  | 10.0%  | 148  | 11.8%  | 87              | 7.8%   | 235   | 9.9%   |
|                                                                                  | 2 Two-person household          | 1245 | 50.7%  | 627  | 49.9%  | 574             | 51.4%  | 1201  | 50.6%  |
|                                                                                  | 3 Multiple-person household     | 967  | 39.4%  | 482  | 38.3%  | 456             | 40.8%  | 938   | 39.5%  |
|                                                                                  | Total                           | 2457 | 100.0% | 1257 | 100.0% | 1117            | 100.0% | 2374  | 100.0% |
| <b>Time spent on care</b>                                                        | 0 For a defined period of hours | 1212 | 53.7%  | 767  | 68.7%  | 421             | 39.2%  | 1188  | 54.2%  |
|                                                                                  | 1 permanently                   | 1045 | 46.3%  | 350  | 31.3%  | 653             | 60.8%  | 1003  | 45.8%  |
|                                                                                  | Total                           | 2257 | 100.0% | 1117 | 100.0% | 1074            | 100.0% | 2191  | 100.0% |
| <b>Behavioral problems</b>                                                       | 0 no                            | 1370 | 57.4%  | 846  | 68.6%  | 473             | 43.7%  | 1319  | 57.0%  |
|                                                                                  | 1 yes                           | 1016 | 42.6%  | 387  | 31.4%  | 609             | 56.3%  | 996   | 43.0%  |
|                                                                                  | Total                           | 2386 | 100.0% | 1233 | 100.0% | 1082            | 100.0% | 2315  | 100.0% |
| <b>Mobility problems</b>                                                         | 0 no                            | 1159 | 48.5%  | 747  | 60.5%  | 382             | 35.1%  | 1129  | 48.6%  |
|                                                                                  | 1 yes                           | 1232 | 51.5%  | 487  | 39.5%  | 705             | 64.9%  | 1192  | 51.4%  |
|                                                                                  | Total                           | 2391 | 100.0% | 1234 | 100.0% | 1087            | 100.0% | 2321  | 100.0% |
| <b>Coverage of care expenses<br/>through care allowance</b>                      | 1 completely                    | 349  | 14.3%  | 205  | 16.6%  | 133             | 11.9%  | 338   | 14.3%  |
|                                                                                  | 2 for the most part             | 702  | 28.8%  | 360  | 29.1%  | 317             | 28.3%  | 677   | 28.7%  |
|                                                                                  | 3 partly                        | 1109 | 45.5%  | 546  | 44.2%  | 528             | 47.1%  | 1074  | 45.6%  |
|                                                                                  | 4 hardly                        | 277  | 11.4%  | 124  | 10.0%  | 144             | 12.8%  | 268   | 11.4%  |
|                                                                                  | Total                           | 2437 | 100.0% | 1235 | 100.0% | 1122            | 100.0% | 2357  | 100.0% |
| <b>Living situation</b>                                                          | 0 Living without Caregiver      | 972  | 40.1%  | 601  | 48.3%  | 344             | 31.4%  | 945   | 40.4%  |
|                                                                                  | 1 Living with Caregiver         | 1453 | 59.9%  | 643  | 51.7%  | 753             | 68.6%  | 1396  | 59.6%  |
|                                                                                  | Total                           | 2425 | 100.0% | 1244 | 100.0% | 1097            | 100.0% | 2341  | 100.0% |
| <b>Abandonment/restriction of<br/>professional activity</b>                      | 0 No                            | 1218 | 75.4%  | 672  | 82.3%  | 510             | 67.6%  | 1182  | 75.2%  |
|                                                                                  | 1 Yes                           | 398  | 24.6%  | 145  | 17.7%  | 244             | 32.4%  | 389   | 24.8%  |
|                                                                                  | Total                           | 1616 | 100.0% | 817  | 100.0% | 754             | 100.0% | 1571  | 100.0% |

***Categorical independent variables (continuation)***

|                                                 |       |      |        | 0 no |        | Burden<br>1 yes |        | Total |        |
|-------------------------------------------------|-------|------|--------|------|--------|-----------------|--------|-------|--------|
|                                                 |       | n    | %      | n    | %      | n               | %      | n     | %      |
| <b>E35 Utilization of 24-hour care services</b> | 0 no  | 2014 | 82.3%  | 1068 | 85.4%  | 891             | 79.8%  | 1959  | 82.8%  |
|                                                 | 1 yes | 433  | 17.7%  | 183  | 14.6%  | 225             | 20.2%  | 408   | 17.2%  |
|                                                 | Total | 2447 | 100.0% | 1251 | 100.0% | 1116            | 100.0% | 2367  | 100.0% |
| <b>E38 Utilization of mobile care services</b>  | 0 no  | 1565 | 65.0%  | 861  | 69.8%  | 662             | 60.0%  | 1523  | 65.2%  |
|                                                 | 1 yes | 842  | 35.0%  | 373  | 30.2%  | 441             | 40.0%  | 814   | 34.8%  |
|                                                 | Total | 2407 | 100.0% | 1234 | 100.0% | 1103            | 100.0% | 2337  | 100.0% |

***Continuous independent variables***

|                                                   | M   | SD  | Burden |     |       |     |
|---------------------------------------------------|-----|-----|--------|-----|-------|-----|
|                                                   |     |     | 0 no   |     | 1 yes |     |
|                                                   | M   | SD  | M      | SD  | M     | SD  |
| Care dependency level                             | 3.3 | 1.8 | 2.9    | 1.7 | 3.8   | 1.8 |
| Number of persons living in caregiver's household | 2.7 | 1.9 | 2.7    | 2.4 | 2.7   | 1.2 |
| Health status                                     | 2.5 | 0.8 | 2.3    | 0.8 | 2.8   | 0.8 |
| Intensity of care: Direct Care                    | 3.6 | 1.3 | 3.1    | 1.3 | 4.1   | 1.0 |
| Intensity of care: Mobility & joint dislocations  | 3.3 | 1.3 | 3.0    | 1.3 | 3.7   | 1.3 |
| Intensity of care: Organizational                 | 3.3 | 1.1 | 3.0    | 1.1 | 3.6   | 1.1 |

## Correlations between caregiver burden and independent variables

|                                                       |        | C28      | C28bi    | A4       | A8       | F49      | A11     | B19     | B23      | B24     | F52      | F56     | F60     | DC       | DL      | Mob     | Org    | E35     | E38  |
|-------------------------------------------------------|--------|----------|----------|----------|----------|----------|---------|---------|----------|---------|----------|---------|---------|----------|---------|---------|--------|---------|------|
| C28 Caregiver Burden                                  | $\rho$ | --       |          |          |          |          |         |         |          |         |          |         |         |          |         |         |        |         |      |
|                                                       | $p$    |          |          |          |          |          |         |         |          |         |          |         |         |          |         |         |        |         |      |
|                                                       | $n$    | 2438     |          |          |          |          |         |         |          |         |          |         |         |          |         |         |        |         |      |
| C2bi Burden                                           | $\rho$ | 0.893**  | --       |          |          |          |         |         |          |         |          |         |         |          |         |         |        |         |      |
|                                                       | $p$    | <0.001   |          |          |          |          |         |         |          |         |          |         |         |          |         |         |        |         |      |
|                                                       | $n$    | 2438     | 2438     |          |          |          |         |         |          |         |          |         |         |          |         |         |        |         |      |
| A4 Care dependency level                              | $\rho$ | 0.298**  | 0.259**  | --       |          |          |         |         |          |         |          |         |         |          |         |         |        |         |      |
|                                                       | $p$    | <0.001   | <0.001   |          |          |          |         |         |          |         |          |         |         |          |         |         |        |         |      |
|                                                       | $n$    | 2357     | 2357     | 2446     |          |          |         |         |          |         |          |         |         |          |         |         |        |         |      |
| A8 Relation to Caregiver Person                       | $\rho$ | -0.055** | -0.053** | -0.022   | --       |          |         |         |          |         |          |         |         |          |         |         |        |         |      |
|                                                       | $p$    | 0,004    | 0,005    | 0,141    |          |          |         |         |          |         |          |         |         |          |         |         |        |         |      |
|                                                       | $n$    | 2373     | 2373     | 2380     | 2459     |          |         |         |          |         |          |         |         |          |         |         |        |         |      |
| F49 Gender of caregiver                               | $\rho$ | 0.092**  | 0.078**  | 0.040*   | 0.065**  | --       |         |         |          |         |          |         |         |          |         |         |        |         |      |
|                                                       | $p$    | <0.001   | <0.001   | 0,024    | 0,001    |          |         |         |          |         |          |         |         |          |         |         |        |         |      |
|                                                       | $n$    | 2386     | 2386     | 2387     | 2404     | 2471     |         |         |          |         |          |         |         |          |         |         |        |         |      |
| A11 Living situation                                  | $\rho$ | 0.208**  | 0.172**  | 0.107**  | -0.474** | -0.063** | --      |         |          |         |          |         |         |          |         |         |        |         |      |
|                                                       | $p$    | <0.001   | <0.001   | <0.001   | <0.001   | 0,001    |         |         |          |         |          |         |         |          |         |         |        |         |      |
|                                                       | $n$    | 2341     | 2341     | 2349     | 2363     | 2368     | 2425    |         |          |         |          |         |         |          |         |         |        |         |      |
| B19 Time spent on care                                | $\rho$ | 0.342**  | 0.296**  | 0.334**  | -0.318** | 0.035*   | 0.548** | --      |          |         |          |         |         |          |         |         |        |         |      |
|                                                       | $p$    | <0.001   | <0.001   | <0.001   | <0.001   | 0,050    | <0.001  |         |          |         |          |         |         |          |         |         |        |         |      |
|                                                       | $n$    | 2191     | 2191     | 2188     | 2199     | 2208     | 2169    | 2257    |          |         |          |         |         |          |         |         |        |         |      |
| B23 Behavioural problems                              | $\rho$ | 0.282**  | 0.251**  | 0.197**  | 0.081**  | 0.034*   | 0.012   | 0.128** | --       |         |          |         |         |          |         |         |        |         |      |
|                                                       | $p$    | <0.001   | <0.001   | <0.001   | <0.001   | 0,048    | 0,282   | <0.001  |          |         |          |         |         |          |         |         |        |         |      |
|                                                       | $n$    | 2315     | 2315     | 2314     | 2320     | 2333     | 2290    | 2141    | 2386     |         |          |         |         |          |         |         |        |         |      |
| B24 Reduced Mobility                                  | $\rho$ | 0.277**  | 0.254**  | 0.509**  | -0.018   | -0.028   | 0.129** | 0.264** | 0.078**  | --      |          |         |         |          |         |         |        |         |      |
|                                                       | $p$    | <0.001   | <0.001   | <0.001   | 0,193    | 0,085    | <0.001  | <0.001  | <0.001   |         |          |         |         |          |         |         |        |         |      |
|                                                       | $n$    | 2321     | 2321     | 2310     | 2327     | 2340     | 2298    | 2141    | 2278     | 2391    |          |         |         |          |         |         |        |         |      |
| F52 Health status                                     | $\rho$ | 0.367**  | 0.316**  | 0.034*   | -0.126** | 0.044*   | 0.172** | 0.169** | 0.102**  | 0.115** | --       |         |         |          |         |         |        |         |      |
|                                                       | $p$    | <0.001   | <0.001   | 0,050    | <0.001   | 0,016    | <0.001  | <0.001  | <0.001   | <0.001  |          |         |         |          |         |         |        |         |      |
|                                                       | $n$    | 2372     | 2372     | 2371     | 2386     | 2440     | 2352    | 2195    | 2318     | 2324    | 2455     |         |         |          |         |         |        |         |      |
| F56 Number of persons living in caregiver's household | $\rho$ | 0.055**  | 0.035*   | 0.121**  | 0.103**  | 0.042*   | 0.203** | 0.100** | 0.090**  | 0.058** | -0.076** | --      |         |          |         |         |        |         |      |
|                                                       | $p$    | 0,004    | 0,043    | <0.001   | <0.001   | 0,019    | <0.001  | <0.001  | <0.001   | 0,003   | <0.001   |         |         |          |         |         |        |         |      |
|                                                       | $n$    | 2374     | 2374     | 2373     | 2393     | 2442     | 2354    | 2201    | 2320     | 2327    | 2426     | 2458    |         |          |         |         |        |         |      |
| F60 Abandonment/restriction of professional activity  | $\rho$ | 0.195**  | 0.169**  | 0.204**  | 0.040    | 0.130**  | 0.113** | 0.120** | 0.146**  | 0.078** | 0.074**  | 0.215** | --      |          |         |         |        |         |      |
|                                                       | $p$    | <0.001   | <0.001   | <0.001   | 0,058    | <0.001   | <0.001  | <0.001  | <0.001   | 0,001   | 0,002    | <0.001  |         |          |         |         |        |         |      |
|                                                       | $n$    | 1571     | 1571     | 1571     | 1565     | 1608     | 1554    | 1453    | 1529     | 1530    | 1595     | 1606    | 1616    |          |         |         |        |         |      |
| DC Intensity of care: Direct Care                     | $\rho$ | 0.444**  | 0.390**  | 0.434**  | -0.172** | 0.059**  | 0.419** | 0.563** | 0.244**  | 0.387** | 0.174**  | 0.124** | 0.211** | --       |         |         |        |         |      |
|                                                       | $p$    | <0.001   | <0.001   | <0.001   | <0.001   | 0,002    | <0.001  | <0.001  | <0.001   | <0.001  | <0.001   | <0.001  | <0.001  |          |         |         |        |         |      |
|                                                       | $n$    | 2406     | 2406     | 2401     | 2413     | 2425     | 2383    | 2226    | 2357     | 2354    | 2412     | 2412    | 1588    | 2483     |         |         |        |         |      |
| DL Intensity of care: Support in daily life           | $\rho$ | 0.316**  | 0.276**  | 0.148**  | -0.309** | 0.089**  | 0.569** | 0.560** | 0.079**  | ,163**  | 0.146**  | 0.104** | 0.147** | 0.643**  | --      |         |        |         |      |
|                                                       | $p$    | <0.001   | <0.001   | <0.001   | <0.001   | <0.001   | <0.001  | <0.001  | <0.001   | <0.001  | <0.001   | <0.001  | <0.001  | <0.001   |         |         |        |         |      |
|                                                       | $n$    | 2424     | 2424     | 2424     | 2437     | 2448     | 2404    | 2246    | 2371     | 2373    | 2433     | 2436    | 1605    | 2470     | 2507    |         |        |         |      |
| Mob Intensity of care: Mobility & joint dislocations  | $\rho$ | 0.295**  | 0.261**  | 0.188**  | -0.128** | -0.008   | 0.323** | 0.382** | 0.086**  | ,272**  | 0.118**  | 0.043*  | 0.097** | 0.686**  | 0.524** | --      |        |         |      |
|                                                       | $p$    | <0.001   | <0.001   | <0.001   | <0.001   | 0,344    | <0.001  | <0.001  | <0.001   | <0.001  | <0.001   | 0,019   | <0.001  | <0.001   | <0.001  |         |        |         |      |
|                                                       | $n$    | 2332     | 2332     | 2324     | 2333     | 2345     | 2304    | 2159    | 2292     | 2279    | 2333     | 2336    | 1539    | 2388     | 2394    | 2402    |        |         |      |
| Org Intensity of care: Organizational                 | $\rho$ | 0.306**  | 0.264**  | 0.172**  | -0.132** | -0.026   | 0.347** | 0.355** | 0.170**  | ,155**  | 0.153**  | 0.136** | 0.110** | 0.502**  | 0.510** | 0.424** | --     |         |      |
|                                                       | $p$    | <0.001   | <0.001   | <0.001   | <0.001   | 0,099    | <0.001  | <0.001  | <0.001   | <0.001  | <0.001   | <0.001  | <0.001  | <0.001   | <0.001  | <0.001  |        |         |      |
|                                                       | $n$    | 2382     | 2382     | 2380     | 2396     | 2405     | 2362    | 2221    | 2336     | 2335    | 2391     | 2395    | 1577    | 2429     | 2456    | 2356    | 2463   |         |      |
| E35 Utilization of 24-hour care services              | $\rho$ | -0.072** | -0.073** | -0.399** | -0.144** | 0.057**  | 0.181** | 0.064** | -0.127** | -,256** | 0.004    | 0.004   | 0.021   | -0.021   | 0.221** | 0.053** | -0.009 | --      |      |
|                                                       | $p$    | <0.001   | <0.001   | <0.001   | <0.001   | 0,003    | <0.001  | 0,001   | <0.001   | <0.001  | 0,430    | 0,420   | 0,206   | 0,154    | <0.001  | 0,005   | 0,330  |         |      |
|                                                       | $n$    | 2367     | 2367     | 2368     | 2378     | 2394     | 2349    | 2196    | 2325     | 2326    | 2378     | 2383    | 1571    | 2404     | 2430    | 2334    | 2391   | 2447    |      |
| E38 Utilization of mobile care services               | $\rho$ | -0.109** | -0.102** | -0.145** | -0.047*  | -0.006   | 0.119** | 0.012   | -0.044*  | -,109** | -0.048*  | 0.058** | -0.035  | -0.048** | 0.062** | 0.035*  | 0.032  | -0.041* | --   |
|                                                       | $p$    | <0.001   | <0.001   | <0.001   | 0,012    | 0,386    | <0.001  | 0,285   | 0,018    | <0.001  | 0,010    | 0,003   | 0,082   | 0,009    | 0,001   | 0,047   | 0,062  | 0,023   |      |
|                                                       | $n$    | 2337     | 2337     | 2329     | 2341     | 2358     | 2312    | 2170    | 2282     | 2283    | 2342     | 2349    | 1553    | 2366     | 2392    | 2295    | 2352   | 2372    | 2407 |

\*, The correlation is significant at the 0.05 level (2-sided). \*\*, The correlation is significant at the 0.01 level (2-sided).
